# Supplementary material
Source: MDPI journal article supplement (https://www.mdpi.com/2073-4344/13/2/327)
Supplement: s1 [file s1]

Supplemental Information

# Efficient Bias-Free Degradation of Sulfamethazine by TiO<sub>2</sub> Nanoneedle Arrays Photoanode and Co<sub>3</sub>O<sub>4</sub> Photocathode System under LED-Light Irradiation

Zhongzheng Hu <sup>1,2,†</sup>, Ruiheng Liang <sup>1,2,†</sup>, Xiangru Song <sup>1,2</sup>, Huizhong Wu <sup>1,2</sup>, Jiangli Sun <sup>1,2</sup>, Jingyang Liu <sup>1,2</sup>, Minghua Zhou <sup>1,2,\*</sup> and Omotayo A. Arotiba <sup>3,4</sup>

<sup>1</sup> Tianjin Key Laboratory of Environmental Technology for Complex Trans-Media Pollution,  
College of Environmental Science and Engineering, Nankai University,  
Tianjin 300350, China; huzhzh20@163.com (Z.H.); liangruiheng0908@163.com (R.L.); sxramber@163.com (X.S.);  
paxl2625140051@163.com (H.W.); 15636825651@163.com (J.S.);  
nglsjy@163.com (J.L.)

<sup>2</sup> Tianjin Advanced Water Treatment Technology International Joint Research Center,  
College of Environmental Science and Engineering, Nankai University,  
Tianjin 300350, China

<sup>3</sup> Department of Chemical Sciences, University of Johannesburg, Doornfontein,  
Johannesburg 2028, South Africa; oarotiba@uj.ac.za

<sup>4</sup> Centre for Nanomaterials Science Research, University of Johannesburg,  
Johannesburg 2028, South Africa

\* Correspondence: zhoumh@nankai.edu.cn

† These authors contributed equally to this work.

## 1. Experimental Section

### 1.1 Chemicals and materials.

The Ti mesh was purchased from Anping Anheng metal mesh manufacture Co., Ltd. Cobalt nitrate ( $\text{Co}(\text{NO}_3)_2 \cdot 6\text{H}_2\text{O}$ ,  $\geq 99.99\%$ ), ethylenediaminetetraacetic acid disodium ( $\text{Na}_2\text{EDTA}$ , 99.0%), acetylacetone (99 %) and ammonium fluoride ( $\text{NH}_4\text{F}$ , 98%) were purchased from Macklin Biochemical Co., Ltd. Titanium (IV) isopropoxide ( $\geq 98\%$ ) was bought from Acros Organics (China) Co., LTD. sulfamethazine (SMT, 98%) and 5,5-dimethyl-1-pyrroline N-oxide (DMPO, 97%) were bought from Shanghai Aladdin Chemistry Co., Ltd., China. Isopropanol (IPA,  $\geq 99.7\%$ ), ammonium oxalate (AO,  $\geq 99.8\%$ ), sodium chloride ( $\text{NaCl}$ ), sodium sulfate ( $\text{Na}_2\text{SO}_4$ ), sodium carbonate ( $\text{Na}_2\text{CO}_3$ ), trisodium phosphate ( $\text{Na}_3\text{PO}_4$ ) were provided by Damao Chemical reagent factory, China.

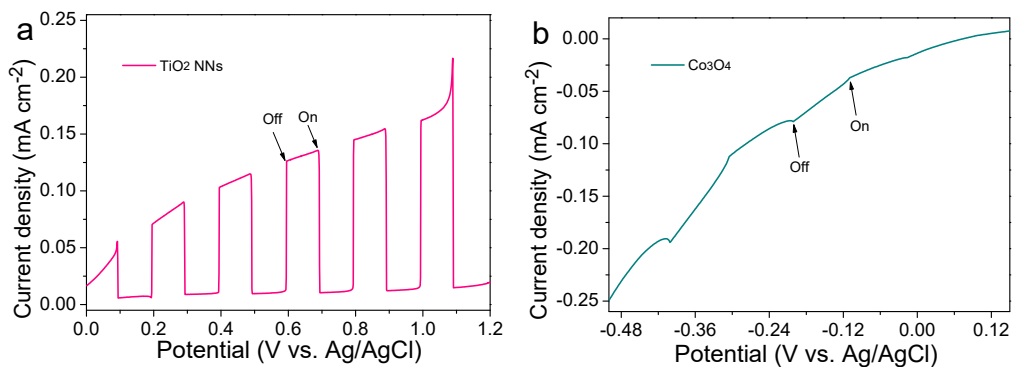

**Figure S1.** Linear sweep voltammetry (LSV) curves of the as-prepared TiO<sub>2</sub> NNs photoanode (a) and Co<sub>3</sub>O<sub>4</sub> photocathode (b).

As depicted in the **Figure S1a**, the obvious and reproducible photocurrent indicated the high-efficiency and stability of TiO<sub>2</sub> NNs photoanode. Although the Co<sub>3</sub>O<sub>4</sub> photocathode has strong light response ability, the photocurrent is small due to the low separation and transfer rate of photogenerated carriers (**Figure S1b**). Therefore, the Co<sub>3</sub>O<sub>4</sub> photocathode has two functions in bias-free TiO<sub>2</sub> NNs-Co<sub>3</sub>O<sub>4</sub> PEC system. On the one hand, it is to increase the photovoltage to the level that could make this system operate without external bias. On the other hand, it is to improve the utilization rate of solar energy and further reduce external energy input.

**Table S1.** The quality parameters of the actual environmental matrices.

| Parameters                | pH  | Conductivity<br>( $\mu\text{S cm}^{-1}$ ) | COD<br>( $\text{mg L}^{-1}$ ) | TOC<br>( $\text{mg L}^{-1}$ ) | $\text{Cl}^{-}$<br>( $\text{mg L}^{-1}$ ) | $\text{SO}_4^{2-}$<br>( $\text{mg L}^{-1}$ ) |
|---------------------------|-----|-------------------------------------------|-------------------------------|-------------------------------|-------------------------------------------|----------------------------------------------|
| Pharmaceutical wastewater | 7.2 | 1986                                      | 93                            | 33.1                          | 334.8                                     | 302.5                                        |
| Mariculture wastewater    | 8.0 | 32000                                     | 24                            | -                             | 9000                                      | 4500                                         |

**Table S2.** Equivalent circuits fitting of EIS data for TiO<sub>2</sub> NNs-Co<sub>3</sub>O<sub>4</sub>, TiO<sub>2</sub> NNs-Pt and Pt-Co<sub>3</sub>O<sub>4</sub> system with or without LED lamp illumination

| PEC system                                          | Condition | Rct ( $\Omega$ ) | Equivalent Circuits                                                                |
|-----------------------------------------------------|-----------|------------------|------------------------------------------------------------------------------------|
| TiO <sub>2</sub> NNs-Co <sub>3</sub> O <sub>4</sub> | Light     | 16.4             | 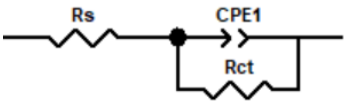 |
|                                                     | Dark      | 21.78            |                                                                                    |
| TiO <sub>2</sub> NNs-Pt                             | Light     | 22.22            |                                                                                    |
|                                                     | Dark      | 34.45            |                                                                                    |
| Pt-Co <sub>3</sub> O <sub>4</sub>                   | Light     | 115.5            |                                                                                    |
|                                                     | Dark      | 407.8            |                                                                                    |
